# Supplementary material
Source: publisher site journal article supplement (https://www.dovepress.com/article/293338)
Supplement: Supplementary file 1 [file get_supplementary_file.php]

## مدى انتشار حالات الآلام العضلية العظمية والعوامل المصاحبة بين الحجاج البالغين خلال فترة الحج

### السلام عليكم ورحمة الله وبركاته

عزيرتي الحاج - عزيرتي الحاجة  
المديرية العامة للشؤون الصحية بمكة المكرمة ممثلة في إدارة التأهيل الطبي بالتعاون مع جامعة أم القرى ممثلة بكلية العلوم الطبية التطبيقية تتمنى منكم المشاركة في تعبئة استبيان. جميع الجنسيات الذين أدوا مراسم الحج هذا العام مرحب بهم للمشاركة.

الهدف من هذه الدراسة؟  
الهدف من هذه الدراسة البحثية هي معرفة مدى انتشار حالات الآلام العضلية العظمية التي يتعرض لها الحجاج البالغين والعوامل المرتبطة المحتملة خلال فترة الحج.

كيف سيتم التعامل مع بياناتك عند الموافقة على المشاركة؟  
- مشاركتك في هذه الدراسة تطوعية تماما و لست مرعما على المشاركة.  
- جميع معلوماتك الشخصية سيتم تخزينها بشكل آمن من قبل الباحثين وستبقى هويتك في سرية تامة.  
- نتائج هذه الدراسة سوف تنشر كبحث علمي، ولكن لن تحتوي على أي معلومات تعريفية عنك.

كم من الوقت سوف تستغرقه لتعبئة هذا الاستبيان؟  
تقريبا 5 دقائق.

إذا كنت ترغب في معرفة المزيد عن الدراسة، فلا تتردد في التواصل مع:  
الاخصائي/ جمال الزايدي

- مدير إدارة التأهيل الطبي، المديرية العامة للشؤون الصحية بمكة المكرمة، المملكة العربية السعودية

- البريد الإلكتروني: jalzaydi@moh.gov.sa

الباحث/ منصور الشهري

- محاضر، قسم العلاج الطبيعي وعلوم التأهيل، كلية العلوم الطبية التطبيقية، جامعة أم القرى، المملكة العربية السعودية

- طالب دكتوراه، مركز التميز البحثي الإكلينيكي لآلام واصابات وصحة العمود الفقري، كلية الصحة وعلوم التأهيل، جامعة كوينزلاند، أستراليا

- البريد الإلكتروني: mamshehri@uqu.edu.sa أو m.alshehri@uq.edu.au

هل أنت موافق على المشاركة في تعبئة هذا استبيان؟

نعم

لا

**مدى انتشار حالات الآلام العضلية العظمية والعوامل المصاحبة بين الحجاج البالغين خلال فترة الحج**

**ما هو جنسك؟**

ذكر

انثى

**كم عمرك؟**

٢٩-١٨ سنة

٣٩-٣٠ سنة

٤٩-٤٠ سنة

٥٩-٥٠ سنة

٦٩-٦٠ سنة

٧٠ سنة أو أكثر

**كم وزنك؟**

٤٩ كيلوجرام أو اقل

٥٩-٥٠ كيلوجرام

٦٩-٦٠ كيلوجرام

٧٩-٧٠ كيلوجرام

٨٩-٨٠ كيلوجرام

٩٩-٩٠ كيلوجرام

١٠٩-١٠٠ كيلوجرام

١١٩-١١٠ كيلوجرام

١٢٠ كيلوجرام أو أكثر

### كم طولك؟

١٤٩ سم أو أقل

١٥٠-١٥٩ سم

١٦٠-١٦٩ سم

١٧٠-١٧٩ سم

١٨٠-١٨٩ سم

١٩٠-١٩٩ سم

٢٠٠ سم أو أكثر

- 
- 
- 
- 
- 
- 
- 

### ما هي جنسيتك؟

### هل انت مدخن؟

نعم

لا

- 
- 

### هل تعاني من مرض السكري؟

نعم

لا

- 
- 

### هل تعاني من ارتفاع ضغط الدم؟

نعم

لا

- 
- 

### هل قد فقدت توازنك وسقطت خلال فترة الحج؟

نعم

لا

- 
-

ما هي حالات الآلام العضلية العظمية التي عانيت منها خلال فترة الحج (ألم العضلات او المفاصل)؟

\* يمكنك اختيار اكثر من إجابة

ألم الكتف

ألم العضد

ألم المرفق (الكوع)

ألم الساعد

ألم اليد

ألم الرأس

ألم الرقبة

ألم منتصف الظهر

ألم اسفل الظهر

ألم الحوض

ألم الفخذ

ألم الركبة

ألم الساق

ألم القدم والكاحل

لم أتعرض لأي ألم

أخرى (الرجاء التحديد)

هل حصلت على علاج أو راجعت طبيب بسبب الألم الذي شعرت به خلال فترة الحج؟

نعم

لا

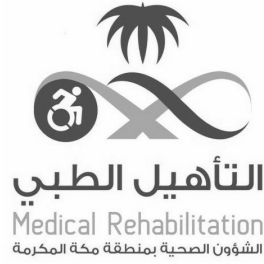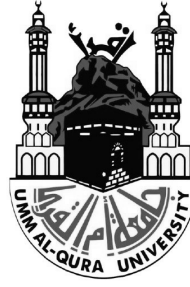

## The Prevalence and Associated Factors of Musculoskeletal Pain among Pilgrims during the Hajj in Saudi Arabia

### Peace and Allahs Mercy and Blessings be Upon You

Dear Pilgrim

The General Directorate of Health Affairs in Makkah (Saudi Arabia), represented by the Medical Rehabilitation Department, in cooperation with Umm Al-Qura University, represented by Faculty of Applied Medical Sciences would like to invite you to participate in filling out a survey. All nationalities who have performed Hajj this year are welcome to participate.

The Purpose of this survey?

The purpose of this research study is to estimate the point prevalence of musculoskeletal pain by anatomical site among pilgrims and to study potential associated factors.

How the data will be treated when you agree to participate?

- Your participation in this study is totally voluntary and you are not obliged to participate.
- All your personal information will be stored securely by the researchers and your identity will remain confidential.
- The results of this study will be published as a scientific research, but will not contain any identifying information about you.

How long will it take to complete this survey?

Approximately 5 minutes.

If you would like to know more about the study, please feel free to contact:

*Jamal Alzaidi*

- Head of Medical Rehabilitation Department, Makkah Health Affairs General Directorate, Saudi Arabia.

- Email: [jalzaydi@moh.gov.sa](mailto:jalzaydi@moh.gov.sa)

*Mansour Alshehri*

- Lecturer, Physiotherapy Department, Faculty of Applied Medical Sciences, Umm Al-Qura University, Saudi Arabia.

- PhD Candidate, NHMRC Centre of Clinical Research Excellence in Spinal Pain, Injury and Health, School of Health and Rehabilitation Sciences, University of Queensland, Australia.

- Email: [mamshehri@uqu.edu.sa](mailto:mamshehri@uqu.edu.sa) or [m.alshehri@uq.edu.au](mailto:m.alshehri@uq.edu.au)

**Are you agree to participate in filling out this survey?**

Yes

No

## The Prevalence and Associated Factors of Musculoskeletal Pain among Pilgrims during the Hajj in Saudi Arabia

### What is your gender?

- Male  
 Female

### What is your age?

- 18-29  
 30-39  
 40-49  
 50-59  
 60-69  
 70 or more

### What is your weight?

- 49 kg or less  
 50-59 kg  
 60-69 kg  
 70-79 kg  
 80-89 kg  
 90-99 kg  
 100-109 kg  
 109-119 kg  
 120 kg or more



**What is your height?**

- 149 cm or less
- 150-159 cm
- 160-169 cm
- 170-179 cm
- 180-189 cm
- 190-199 cm
- 200 cm or more

**What is your nationality?**

**Are you a smoker?**

- Yes
- No

**Do you suffer from diabetes?**

- Yes
- No

**Do you have a high blood pressure?**

- Yes
- No

**Have you lost your balance control and fell during the Hajj?**

- Yes
- No

**What are the musculoskeletal pain conditions you experienced during the Hajj (muscle or joint pain)?**

\* You can choose more than one answer

- Shoulder pain
- Upper arm pain
- Elbow pain
- Forearm pain
- Hand pain
- Head pain
- Neck pain
- Thoracic pain
- Low back pain
- Pelvic pain
- Thigh pain
- Knee pain
- Leg pain
- Foot and ankle pain
- I did not have any pain
- Other (please specify)

**Have you received treatment or have you seen a doctor because of the pain you felt during the Hajj?**

- Yes
- No
